# Supplementary material for: A complex molecular switch directs stress-induced cyclin C nuclear release through SCFGrr1-mediated degradation of Med13
Source: PubMed Central journal article supplement — Mol Biol Cell. 2018 Feb 1;29(3):363–75. doi: 10.1091/mbc.E17-08-0493 (PMC5996960; doi:10.1091/mbc.e17-08-0493), 2018-02-01
Supplement: mbc-29-363-s001.pdf [file mbc-29-363-s001.pdf]

# Supplemental Materials

*Molecular Biology of the Cell*

Stieg et al.

**Supplemental Table 1**

---

| Strain  | Genotype*                                                               | Source                          |
|---------|-------------------------------------------------------------------------|---------------------------------|
| RSY10   |                                                                         | (Strich <i>et al.</i> , 1989)   |
| RSY1006 | <i>sft2Δ::his5<sup>+</sup></i>                                          | (Krasley <i>et al.</i> , 2006)  |
| RSY1696 | <i>cnc1Δ::KANMX6</i>                                                    | (Cooper <i>et al.</i> , 2000)   |
| RSY1701 | <i>med13Δ::HIS3</i>                                                     | (Khakhina <i>et al.</i> , 2014) |
| RSY1706 | <i>med13Δ:: KANMX6</i>                                                  | (Khakhina <i>et al.</i> , 2014) |
| RSY1726 | <i>cdk8Δ:: KANMX6</i>                                                   | (Khakhina <i>et al.</i> , 2014) |
| RSY1736 | <i>kdx1Δ::KANMX6</i>                                                    | (Jin <i>et al.</i> , 2014)      |
| RSY1737 | <i>kdx1Δ::KANMX6 sft2Δ::his5<sup>+</sup></i>                            | (Jin <i>et al.</i> , 2014)      |
| RSY1798 | <i>Med13-myc::KANMX4</i>                                                | (Khakhina <i>et al.</i> , 2014) |
| RSY1770 | <i>grr1Δ::his5<sup>+</sup></i>                                          | This study                      |
| RSY1771 | <i>grr1Δ::his5<sup>+</sup> MED13-13Myc:: KANMX6</i>                     | This study                      |
| RSY1787 | <i>Med12-myc::KANMX4</i>                                                | This study                      |
| RSY2066 | <i>PTetO7-Ubi-Ile::3HA-Cdk8::NatMX4</i>                                 | This study                      |
| PJ69-4a | <i>LYS2::GAL1-HIS3 GAL2-ADE2 met2::GAL7-lacZ</i><br><i>gal4Δ gal80Δ</i> | (James <i>et al.</i> , 1996)    |

---

Yeast strains used in this study. Genotype of all strains is *MATa ade2 ade6 can1-100 his3-11,15 leu2-3,112 trp1-1 ura3-1* except PJ69-4alpha which is *MATa trp1-901 leu2-3,112 ura3-52 his3-200 gal4Δ gal80Δ*

**Supplemental Table 2**

---

| <b>Plasmid Name</b> | <b>Gene</b>                             | <b>Epitope Tag</b> | <b>Marker</b> | <b>Promoter</b> | <b>2<math>\mu</math>/ CEN / int</b> | <b>Reference</b>               |
|---------------------|-----------------------------------------|--------------------|---------------|-----------------|-------------------------------------|--------------------------------|
| pBK38               | <i>CNC1</i>                             | GFP                | <i>URA3</i>   | <i>ADH1</i>     | CEN                                 | (Cooper <i>et al.</i> , 2012)  |
| pKC337              | <i>CNC1</i>                             | 1myc               | <i>TRP1</i>   | <i>ADH1</i>     | CEN                                 | (Cooper <i>et al.</i> , 1997)  |
| pKC800              | <i>GAL4AD-MED13</i>                     | 1HA                | <i>LEU2</i>   | <i>ADH1</i>     | CEN                                 | This study                     |
| pKC801              | <i>MED13</i>                            | 3HA                | <i>URA3</i>   | <i>ADH1</i>     | CEN                                 | This study                     |
| pKC802              | <i>MED13</i> <sup>T210A</sup>           | 3HA                | <i>URA3</i>   | <i>ADH1</i>     | CEN                                 | This study                     |
| pKC803              | <i>MED13</i>                            | 3HA                | <i>LEU2</i>   | <i>ADH1</i>     | CEN                                 | This study                     |
| pLR106              | <i>BCK1-20</i>                          | None               | <i>HIS3</i>   | <i>ADH1</i>     | CEN                                 | (Krasley <i>et al.</i> , 2006) |
| pLR141              | <i>CNC1</i>                             | 1 myc              | <i>URA</i>    | <i>ADH1</i>     | 2 $\mu$                             | This study                     |
| pLR166              | <i>CNC1</i> <sup>S266A</sup>            | 1 myc              | <i>TRP1</i>   | <i>ADH1</i>     | CEN                                 | (Jin <i>et al.</i> , 2014)     |
| pDS2                | <i>GAL4AD -MED13</i> <sup>1-305</sup>   | 1HA                | <i>LEU2</i>   | <i>ADH1</i>     | CEN                                 | This study                     |
| pDS4                | <i>GAL4AD-MED13</i> <sup>907-1421</sup> | 1HA                | <i>LEU2</i>   | <i>ADH1</i>     | CEN                                 | This study                     |
| pDS5                | <i>GAL4AD-MED13</i> <sup>306-906</sup>  | 1HA                | <i>LEU2</i>   | <i>ADH1</i>     | CEN                                 | This study                     |
| pDS6                | <i>GAL4AD-MED13</i> <sup>1-906</sup>    | 1HA                | <i>LEU2</i>   | <i>ADH1</i>     | CEN                                 | This study                     |

---

|               |                                                        |      |             |             |     |                     |
|---------------|--------------------------------------------------------|------|-------------|-------------|-----|---------------------|
| pDS7          | <i>GAL4AD-MED13</i> <sup>306-570</sup>                 | 1HA  | <i>LEU2</i> | <i>ADH1</i> | CEN | This study          |
| pDS8          | <i>GAL4AD-MED13</i> <sup>571-906</sup>                 | 1HA  | <i>LEU2</i> | <i>ADH1</i> | CEN | This study          |
| pDS10         | <i>6HIS- MED13</i> <sup>571-906</sup>                  | -    | -           | -           |     | This study          |
| pDS15         | <i>GAL4AD-MED13</i> <sup>571-650</sup>                 | 1HA  | <i>LEU2</i> | <i>ADH1</i> | CEN | This study          |
| pDS16         | <i>GAL4AD-MED13</i> <sup>651-906</sup>                 | 1HA  | <i>LEU2</i> | <i>ADH1</i> | CEN | This study          |
| pDS30         | <i>GST-MED13</i> <sup>742-844</sup>                    | GST  | -           | -           | -   | This study          |
| pDS22         | <i>6His-MED13</i> <sup>571-650</sup>                   | 6His | -           | -           | -   | This study          |
| pDS32         | <i>GAL4AD-MED13</i> <sup>742-844</sup>                 | 1HA  | <i>LEU2</i> | <i>ADH1</i> | 2μ  | This study          |
| pDS33         | <i>GAL4AD-MED13</i> <sup>742-844</sup><br>S748A        | 1HA  | <i>LEU2</i> | <i>ADH1</i> | 2μ  | This study          |
| pDS34         | <i>GAL4AD-MED13</i> <sup>742-844</sup><br>T781A        | 1HA  | <i>LEU2</i> | <i>ADH1</i> | 2μ  | This study          |
| pDS36         | <i>GAL4AD-MED13</i> <sup>742-844</sup><br>T835A, T837A | 1HA  | <i>LEU2</i> | <i>ADH1</i> | 2μ  | This study          |
| pDS40         | <i>GAL4AD-MED13</i> <sup>742-844</sup><br>T801A        | 1HA  | <i>LEU2</i> | <i>ADH1</i> | 2μ  | This study          |
| pDS41         | <i>GAL4AD-MED13</i> <sup>742-844</sup><br>T781A, T801A | 1HA  | <i>LEU2</i> | <i>ADH1</i> | 2μ  | This study          |
| pDS42         | <i>GAL4AD-MED13</i> <sup>742-844</sup><br>S748A, T781A | 1HA  | <i>LEU2</i> | <i>ADH1</i> | 2μ  | This study          |
| pSW108        | <i>hCCNC1-GAL4</i> <sup>BD</sup>                       | 1HA  | <i>TRP1</i> | <i>ADH1</i> | 2μ  | This study          |
| GST-<br>yCNC1 | <i>GST-yCNC1</i>                                       | GST  | -           | -           | -   | (Wang et al., 2014) |
| 6His-         | 6His-hCNC1                                             | 6His | -           | -           | -   | This study          |

---

|                          |                                                   |             |                  |                  |          |                                                             |
|--------------------------|---------------------------------------------------|-------------|------------------|------------------|----------|-------------------------------------------------------------|
| hCNC1                    |                                                   |             |                  |                  |          |                                                             |
| 6His-<br>pACT2           | 6His-yCNC1<br><i>GAL4AD</i>                       | 6His<br>1HA | -<br><i>LEU2</i> | -<br><i>ADH1</i> | -<br>CEN | This study<br>(Van<br>Criekinge<br>and<br>Beyaert,<br>1999) |
| pAS2                     | <i>GAL4BD</i>                                     | 1HA         | <i>TRP</i>       | <i>ADH1</i>      | CEN      | (Van<br>Criekinge<br>and<br>Beyaert,<br>1999)               |
| pAS2-<br>Grr1            | <i>GAL4BD-GRR1</i>                                | 1HA         | <i>TRP</i>       | <i>ADH1</i>      | CEN      | (Wang and<br>Solomon,<br>2012)                              |
| pAS2-<br>Grr1 $\Delta$ L | <i>GAL4BD-GRR1<sup><math>\Delta</math>L</sup></i> | 1HA         | <i>TRP</i>       | <i>ADH1</i>      | CEN      | (Wang and<br>Solomon,<br>2012)                              |
| pGrr1                    | <i>Grr1</i>                                       | 1HA         | <i>TRP</i>       | <i>ADH1</i>      |          | (Hsiung <i>et al.</i> , 2001)                               |
| pGrr1 $\Delta$ L         | <i>Grr1<math>\Delta</math>L</i>                   | 1HA         | <i>TRP</i>       | <i>ADH1</i>      |          | (Hsiung <i>et al.</i> , 2001)                               |
| Mt-dsRed                 | Mito-targeting                                    | dsRed       | <i>URA3</i>      | <i>ADH1</i>      | CEN      | (Naylor <i>et al.</i> , 2006)                               |
| pHY1022                  | <i>MED13</i>                                      | 3HA         | <i>URA3</i>      | <i>ADH1</i>      | 2 $\mu$  | (Chang <i>et</i>                                            |

---

---

|                       |                                      |     |                |                   |      |                                                    |
|-----------------------|--------------------------------------|-----|----------------|-------------------|------|----------------------------------------------------|
| pHY1089               | <i>MED13</i> <sup>S608A,S1236A</sup> | 3HA | <i>URA3</i>    | <i>ADH1</i>       | 2μ   | <i>al.</i> , 2004)<br>(Chang <i>et al.</i> , 2004) |
| Slit2                 | <i>SLT2</i>                          | 3HA | <i>LEU2</i>    | <i>SLT2</i>       | 2μ   | (Kim <i>et al.</i> , 2008)                         |
| Slit2 <sup>K54R</sup> | <i>SLT2</i> <sup>K54R</sup>          | 3HA | <i>LEU2</i>    | <i>SLT2</i>       | 2μ   | (Kim <i>et al.</i> , 2008)                         |
| pCM188                | <i>TET</i>                           | -   | <i>URA3</i>    | <i>ADH1-Tet02</i> | CEN  | (Gari <i>et al.</i> , 1997)                        |
| pMK634                | <i>Ubi-ILe-3HA</i>                   |     | <i>NAT-MX4</i> | <i>ADH1</i>       | Int. | (Gnanasundaram and Kos, 2015)                      |

---

Plasmids used in this study.

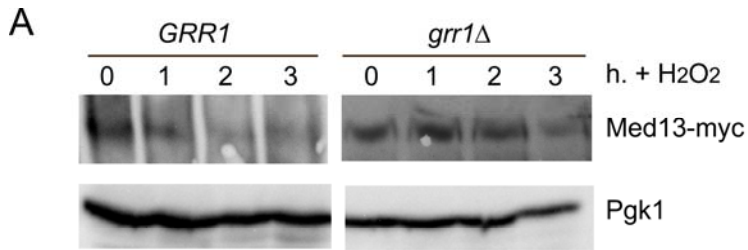

**B**

|     |   |   |   |   |   |   |   |   |   |   |     |              |
|-----|---|---|---|---|---|---|---|---|---|---|-----|--------------|
| 321 | S | S | V | T | L | T | P | P | T | S | 330 | human Med13  |
| 324 | C | G | M | P | L | T | P | P | T | S | 330 | human Med13L |
| 205 | Q | G | Y | L | I | T | P | P | K | H | 214 | yeast Med13  |

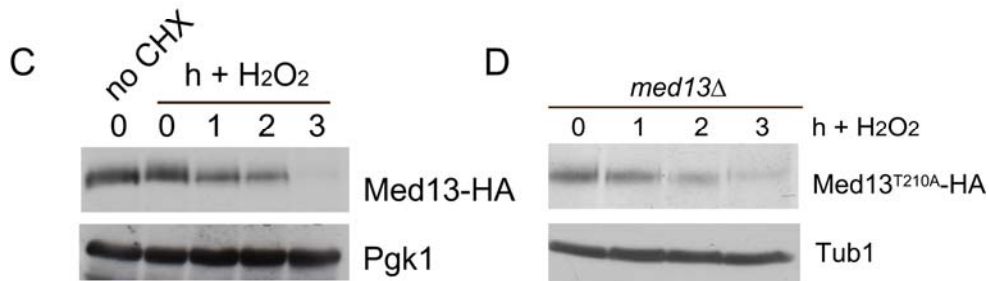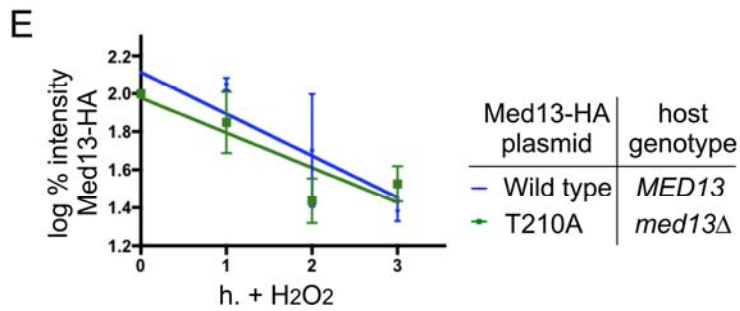



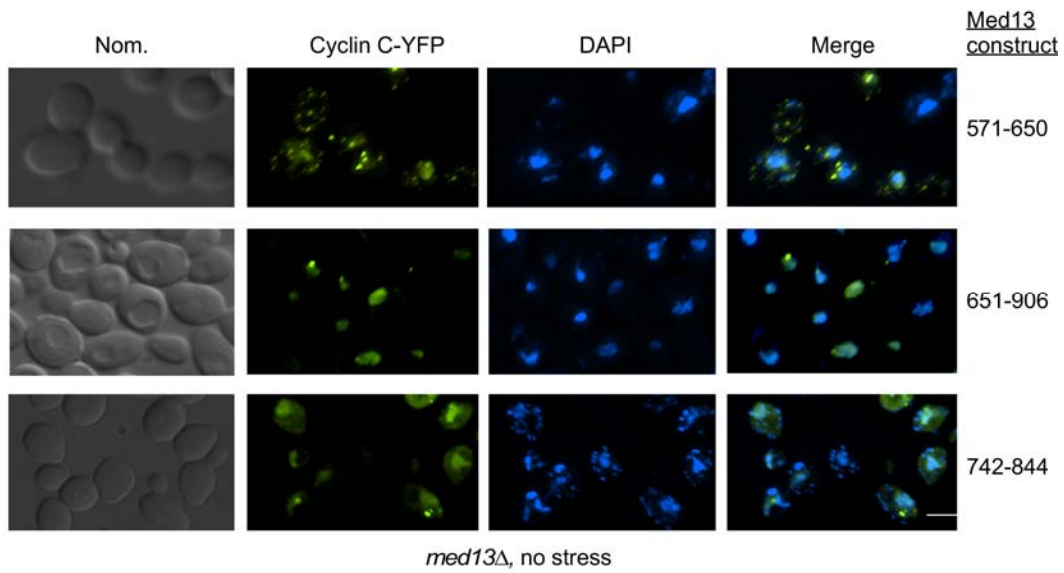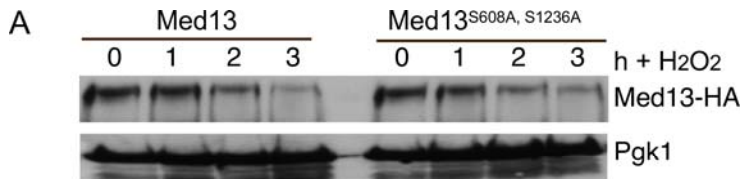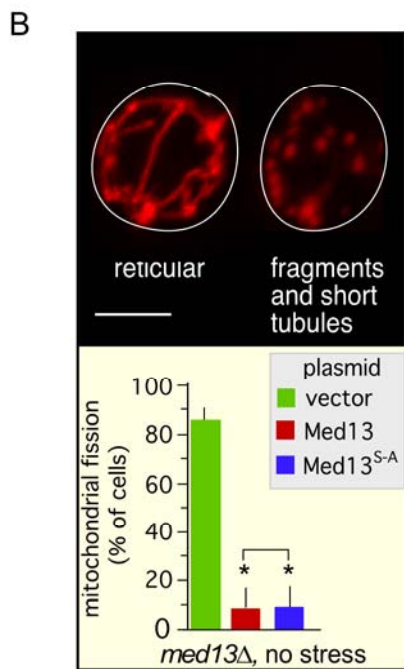

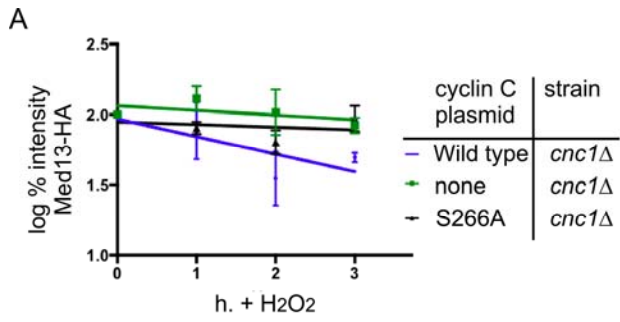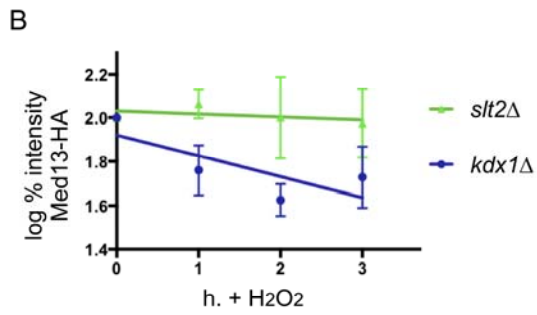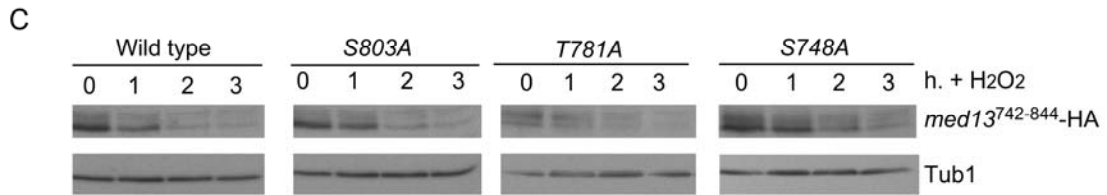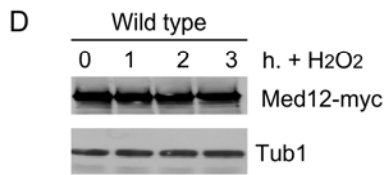

A

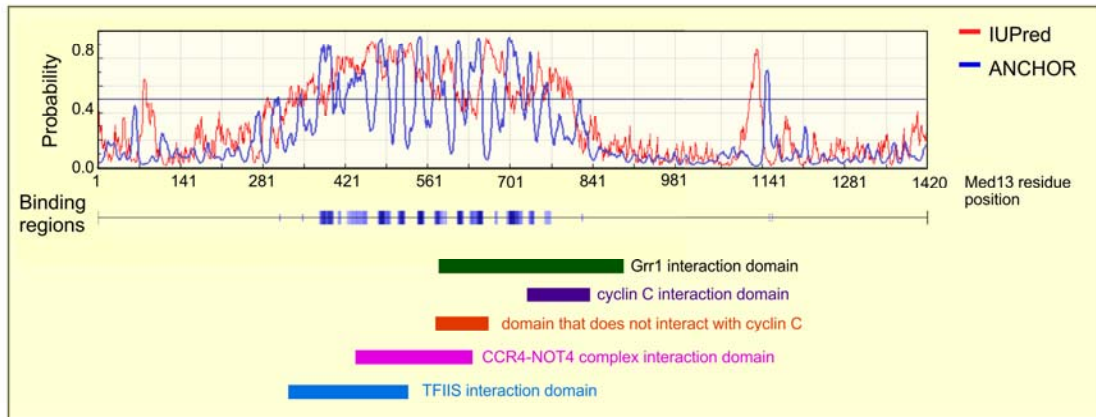

B

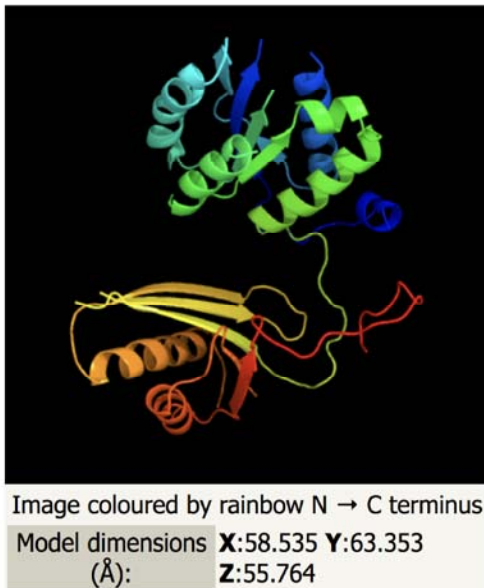

**FIGURE S1.** The human Fbw7 degron on Med13 is not required for Med13 degradation. (A) RSY1771 (*grr1* $\Delta$ ::*HIS3 MED13-myc*::*KAN*) harboring either *ADH1<sub>PRO</sub>-GRR1* or a vector control were treated with 0.4 mM H<sub>2</sub>O<sub>2</sub> for the timepoints indicated and Med13 levels analyzed by Western blot. Tub1 levels were used as loading controls. (B) Conservation of the human Med13 SCF<sup>Fbw7</sup> degron in yeast. (C) Degradation of Med13-HA after treatment of the cells with cycloheximide. Wild type cells (RSY10) harboring Med13-HA (pKC801) were treated with cycloheximide as previously described (Jin *et al.*, 2014) and Med13-HA degradation analyzed as described. Pgk1 was used as a loading

control. (D) *med13* $\Delta$  cells (RSY1701) harboring Med13<sup>T210A</sup> as the only copy of Med13 were treated with 0.4 mM H<sub>2</sub>O<sub>2</sub> for the timepoints indicated and Med13 levels analyzed by Western blot. Tub1 levels were used as a loading control. (E) Quantification of Med13-HA degradation from C and D.

**FIGURE S2.** Fluorescence microscopy of mid-log phase *med13* $\Delta$  cells (Y1701) harboring the Gal<sup>AD</sup>-Med13 fusion constructs shown and cyclin C-YFP (pBK38). Cells were stained with Dapi to visualize the nucleus. Bar = 10 $\mu$ M

**FIGURE S3.** PKA mediated phosphorylation of Med13 is not required for its degradation following H<sub>2</sub>O<sub>2</sub> stress. (A) Wild type (RSY10) cultures expressing either PHY1066 (2 $\mu$  Med13-HA) or PHY2081 (2 $\mu$  Med13-HA plasmid with PKA sites, S608 and S1236 mutated to alanine) were grown to mid-log phase (0 hr) then treated with 0.4 mM for the indicated times. Med13-HA levels were determined by Western blot analysis. Tub1 levels were used as a loading control. (B) The Med13<sup>S808A,S1236A</sup> mutant complements *med13* $\Delta$  mitochondrial morphology. *med13* $\Delta$  cells (RSY1701) expressing either PHY1066, PHY2081 or a vector and the DsRed mitochondrial targeting plasmid (mt-DsRed) were grown to mid-log. Mitochondrial morphology was examined using fluorescence microscopy of living cells. The left hand panel shows representative images of reticular or fragmented mitochondria are shown. Bar = 10 $\mu$ M. The percent of cells (mean  $\pm$  s.e.m.) within the population displaying mitochondrial fission is given \* p<0.05 difference from wild type.

**FIGURE S4.** (A) Quantification of Med13-HA degradation following 0.4mM H<sub>2</sub>O<sub>2</sub> stress for the experiments shown in Fig. 6 (A) and Fig. 7 (B). (C) Wild type (RSY10) cultures harboring either wild type Gal4AD-Med13<sup>742-844</sup> or the various point mutations indicated

were grown to mid-log phase (0 hr) then treated with 0.4 mM H<sub>2</sub>O<sub>2</sub> for the indicated times. Med13-HA levels were determined by Western blot analysis. Tub1 levels were used as a loading control. (D) Med12 is not destroyed in H<sub>2</sub>O<sub>2</sub> stress. A strain harboring endogenous Med12-myc (RSY1787) was treated with 0.4 mM H<sub>2</sub>O<sub>2</sub> for the timepoints indicated and Med12 levels analyzed by Western blot. Tub1 levels were used as loading controls.

**FIGURE S5.** (A). IUPred and ANCHOR plot analysis of Med13. These programs generates a plot with the profiles calculated by IUPred (Dosztanyi *et al.*, 2005), a general disorder prediction method (in red), and ANCHOR (Dosztanyi *et al.*, 2009), a prediction of disordered binding regions (in blue). Underneath the profile, predicted binding regions are indicated by the horizontal bars. The bar is shaded according to the prediction score. Regions that are filtered out are marked by empty bars. Grr1 and cyclin C binding domains identified in this work are also shown. In addition, the domain of Med13 that does not interact with cyclin C is marked as well as the CCR4-NOT4 complex and TFIIIS interaction domains (Liu *et al.*, 2001; Wery *et al.*, 2004). (B) Phyre2 (Kelley *et al.*, 2015) plot analysis of yeast Med13.
